# Supplementary material
Source: PubMed Central journal article supplement (PMC7061414)

**Extended Data Figure 1b**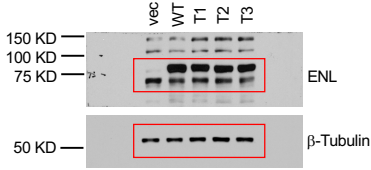**Extended Data Figure 1c**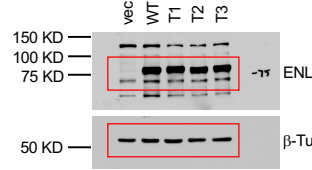**Extended Data Figure 1j**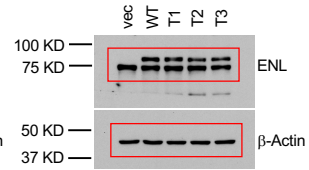**Extended Data Figure 1l**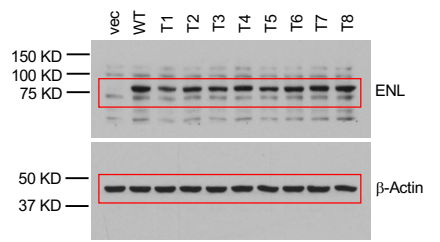**Extended Data Figure 2f**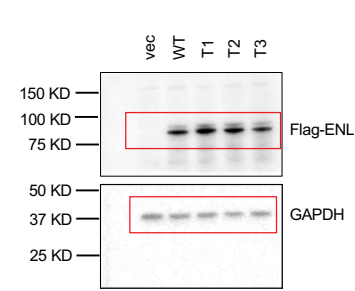**Extended Data Figure 6a**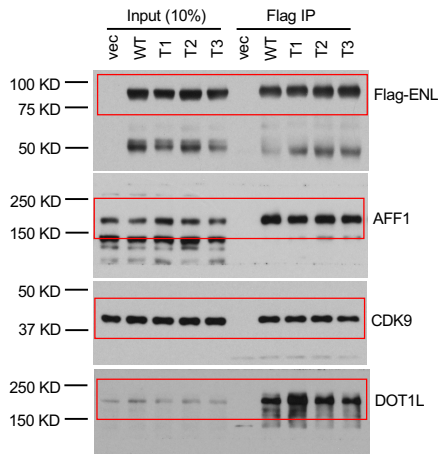**Extended Data Figure 7a**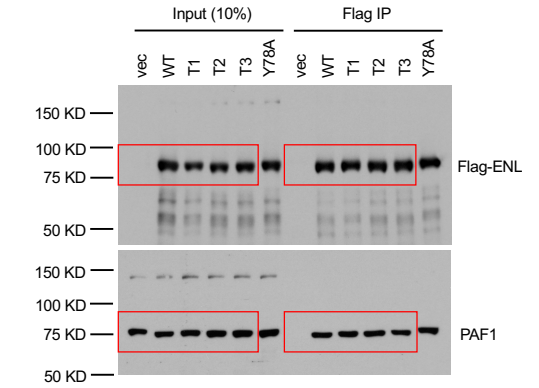**Extended Data Figure 7c**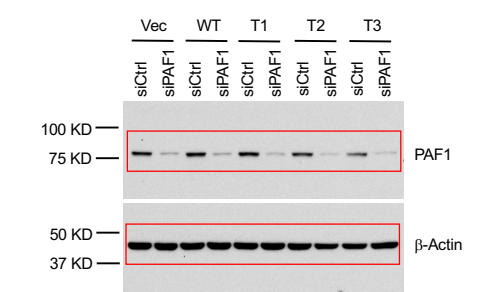**Extended Data Figure 8a**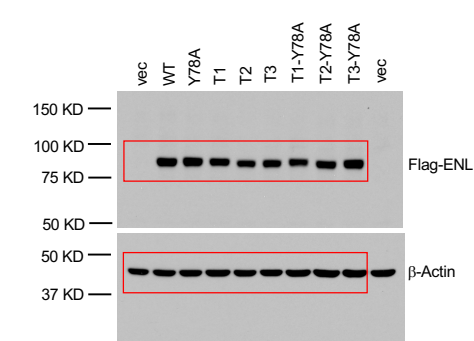**Extended Data Figure 9h**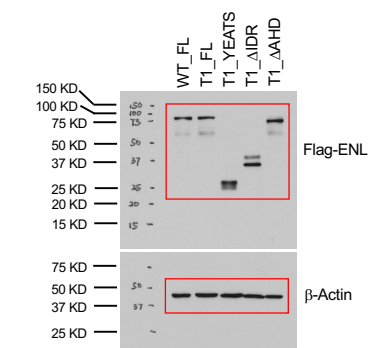

Supplement: NIHMS1557361-supplement-Supplementary_Figure_1.pdf [file NIHMS1557361-supplement-Supplementary_Figure_1.pdf]
